# Supplementary material
Source: publisher figshare collection journal article supplement (https://acs.figshare.com/ndownloader/files/3829228)
Supplement: Supplementary file 1 [file 3829228]

## Supporting Information

### Particle-Assisted Ion Imprinted Cryogel for Selective Cd(II) Ion Removal

Bekir Tabaklı<sup>1</sup>, Aykut Arif Topçu<sup>1,2</sup>, Serhat Döker<sup>3</sup>, Lokman Uzun<sup>1\*</sup>

<sup>1</sup>Hacettepe University, Department of Chemistry, Ankara, Turkey

<sup>2</sup>Kırıkkale University, Department of Biology, Kırıkkale, Turkey

<sup>3</sup>Çankırı Karatekin University, Department of Chemistry, Çankırı, Turkey

\* corresponding author: lokman@hacettepe.edu.tr

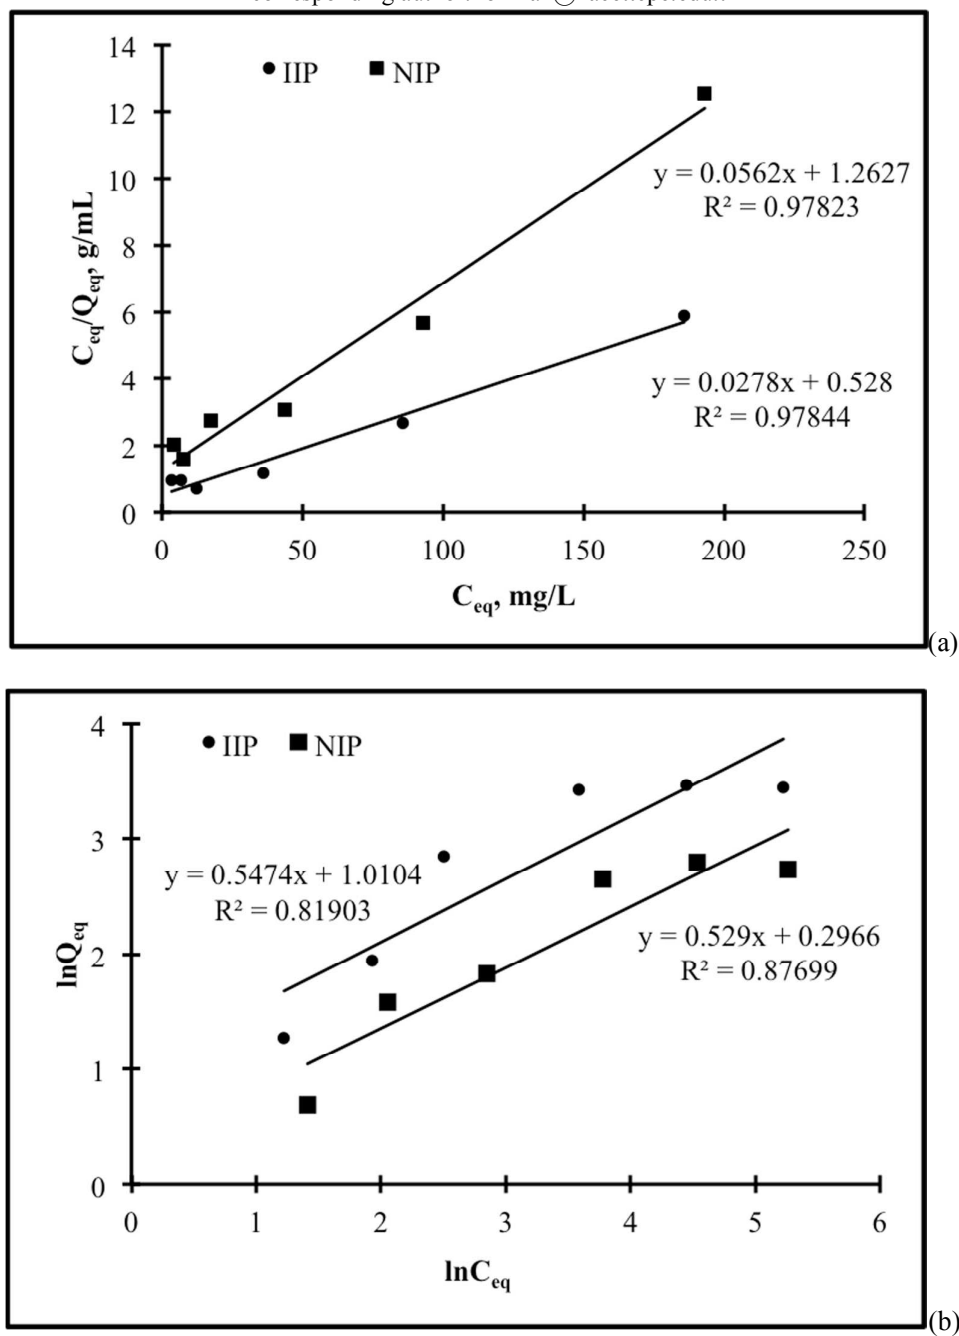

**Figure S1.** (a) Langmuir and (b) Freundlich isotherms for Cd(II) adsorption on IIP and NIP cryogels.

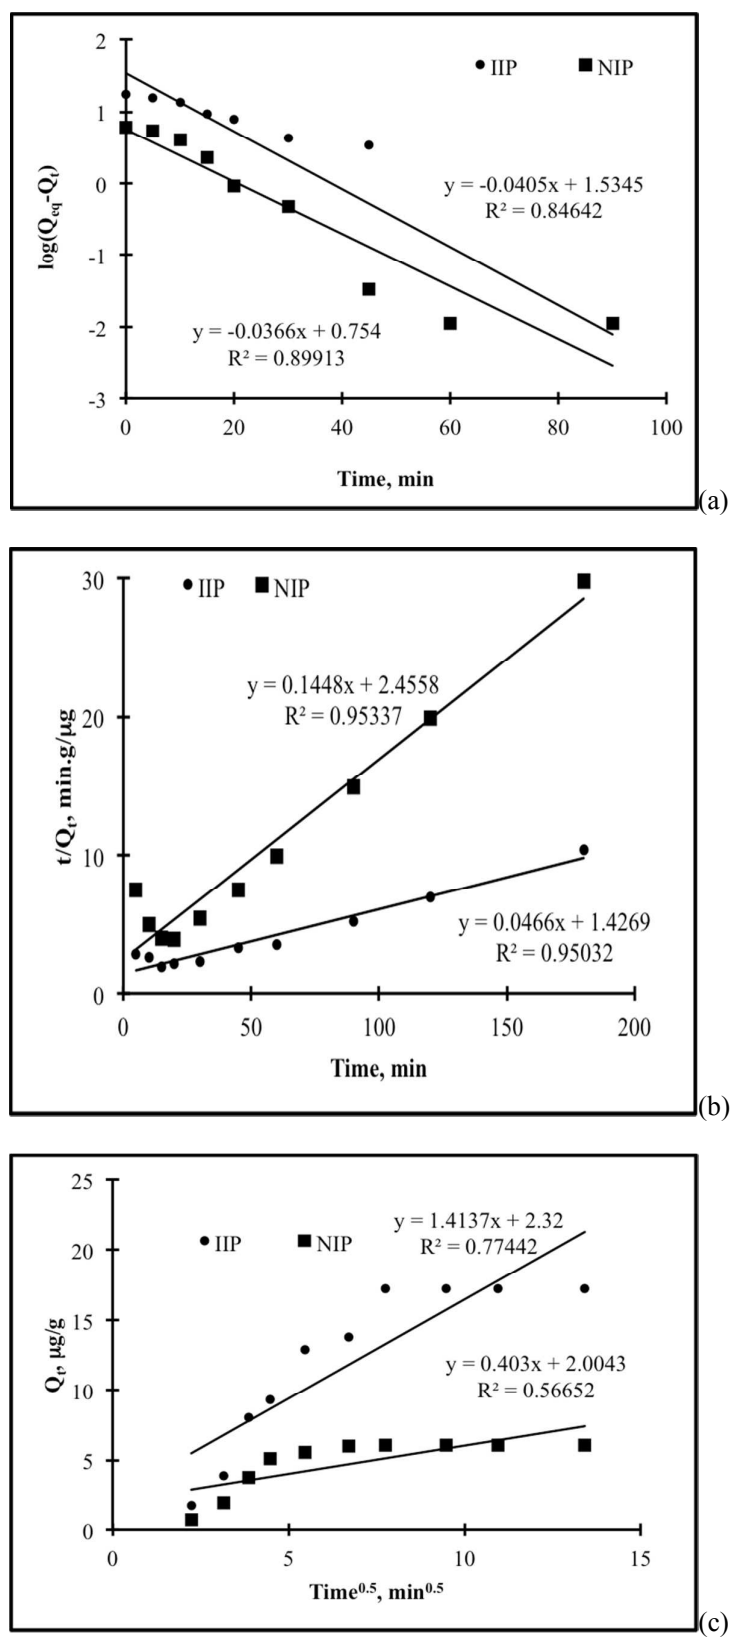

**Figure S2.** (a) Pseudo-first order, (b) pseudo-second order, and (c) Weber-Morris models for Cd(II) adsorption on IIP and NIP cryogels.
